# Supplementary material for: NF-κB signaling activation and roles in thyroid cancers: implication of MAP3K14/NIK
Source: Oncogenesis. 2023 Nov 16;12(1):55. doi: 10.1038/s41389-023-00496-w (PMC10654696; doi:10.1038/s41389-023-00496-w)
Supplement: Supplementary file 1 — Supplementary informations [file 41389_2023_496_MOESM1_ESM.pdf]

## **Supplementary informations**

### **NF- $\kappa$ B signaling activation and roles in thyroid cancers: implication of MAP3K14/NIK**

#### **Supplemental figures.**

Fig. S1. The downregulation of RelA or RelB mRNA in the viability, migration and invasion assays reported in Fig.2.

Fig. S2. The NF- $\kappa$ B related gene expression distinguishes BRAF- and RAS-mutated PTCs.

Fig. S3. The MAPK pathway is not involved in the constitutive activation of NF- $\kappa$ B pathways in BRAF-mutated cell lines.

Fig. S4. The downregulation of NIK mRNA in the EMSA, immunoblot and migration/invasion assays.

Fig. S5. Representative images showing cytoplasmic and nuclear localization of RelA in PTC samples.

#### **Supplemental tables**

Table S4. Clinical characteristics of patients with PTC.

Table S5. Primary antibodies used for immunoblotting and supershift experiments.

Table S6. List of siRNA used for RNA-targeting.

Table S7. Primers sequences used for qRT-PCR.

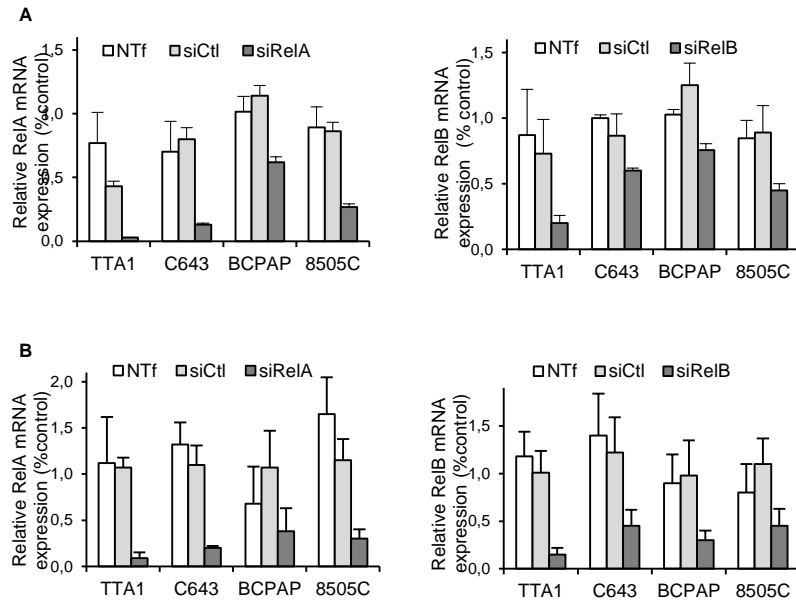

**Fig. S1. The downregulation of RelA or RelB mRNA in the viability, migration and invasion assays reported in Fig.2.** RelA and RelB mRNA expression analysis by qRT-PCR in transfected cell lines used for viability (A), and cell migration and invasion assays (B).

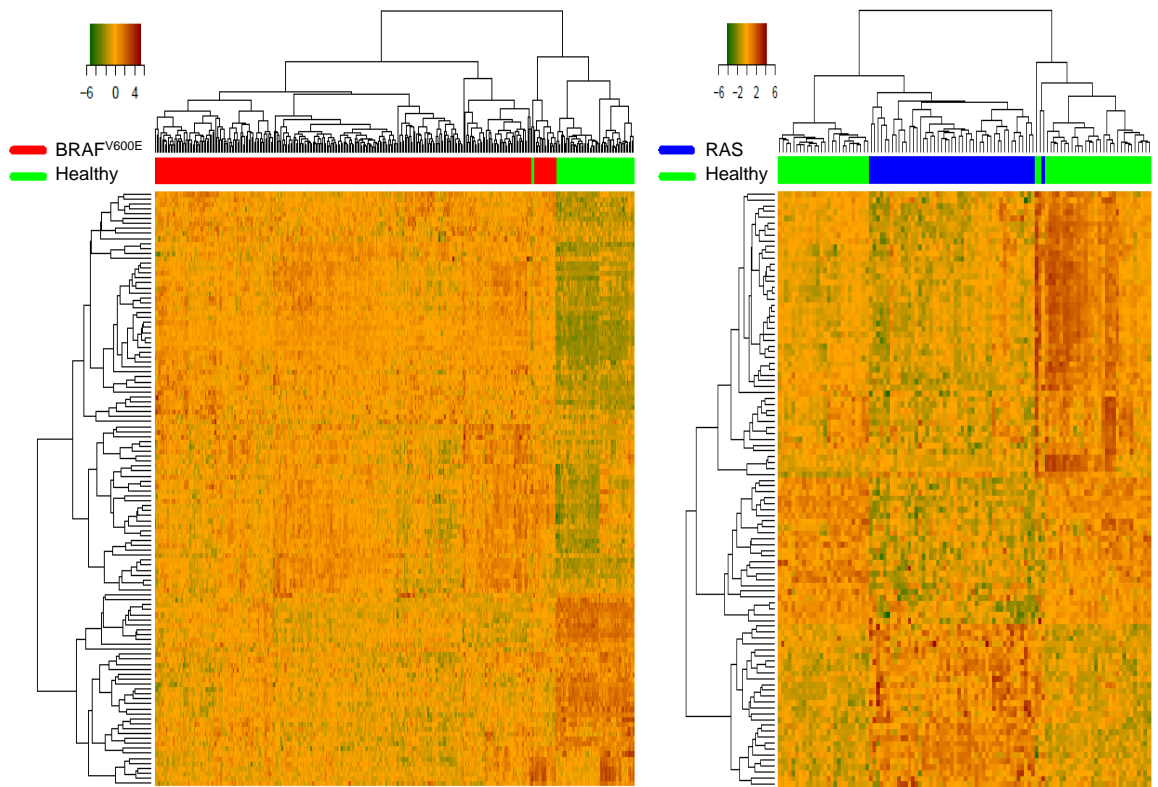

**Fig. S2. The NF- $\kappa$ B related gene expression distinguishes BRAF- and RAS-mutated PTCs.** Heatmaps of the unsupervised clustering of BRAF-mutated PTCs (N=286; left panel) or RAS-mutated PTCs (N=48; right panel) and healthy thyroid tissues (N=58). The clustering of BRAF-PTCs is based on the mRNA expression of the 121 differentially expressed NF- $\kappa$ B target genes ( $fc > 2$ ;  $p < 0.01$ ) in BRAF-mutated PTCs and that of RAS-mutated PTCs is based on the mRNA expression of the 102 differentially expressed NF- $\kappa$ B target genes ( $fc > 2$ ;  $p < 0.01$ ) in RAS-mutated PTCs.

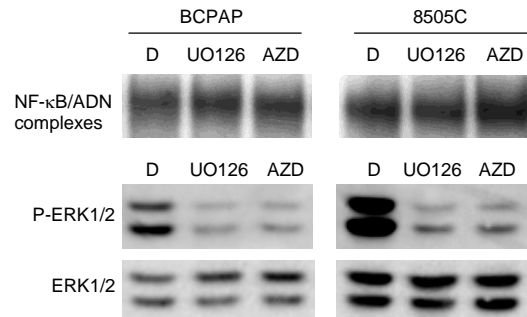

**Fig. S3. The MAPK pathway is not involved in the constitutive activation of NF-κB pathways in BRAF-mutated cell lines.** BCPAP and 8505C cells were incubated with UO126, AZD6244 (AZD) or DMSO (D) as negative control for 24h. NF-κB activity was analyzed in EMSA experiments (upper panels), and p-ERK and total ERK expression was analyzed in immunoblots (lower panels).

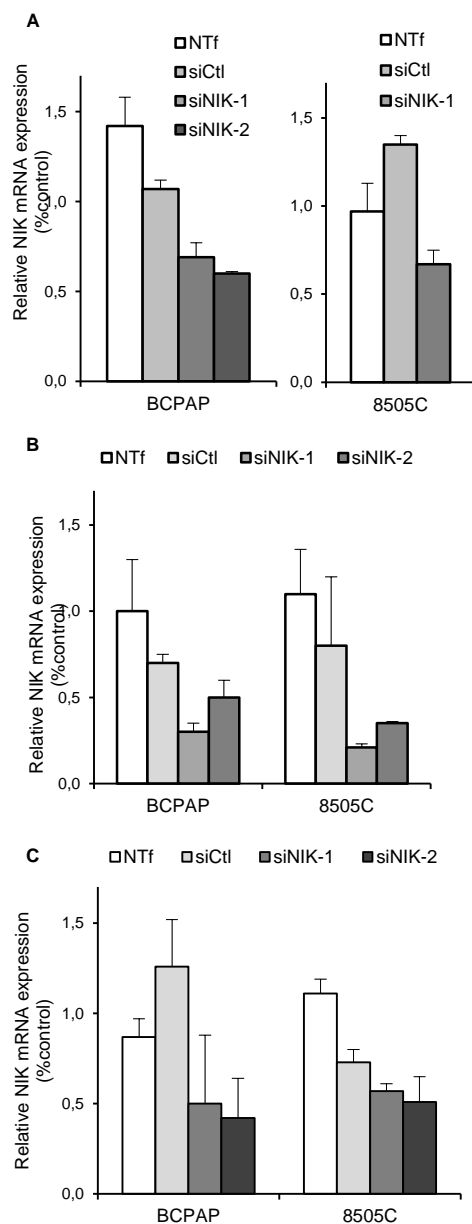

**Fig. S4. The downregulation of NIK mRNA in the EMSA, immunoblot and migration/invasion assays.** NIK mRNA expression analysis by qRT-PCR in BCPAP and 8505C transfected cells used for EMSA experiments reported in Fig. 6A (**A**), for immunoblot analysis reported in Fig. 6B (**B**) and for cell migration and invasion assays reported in Fig.6C (**C**).

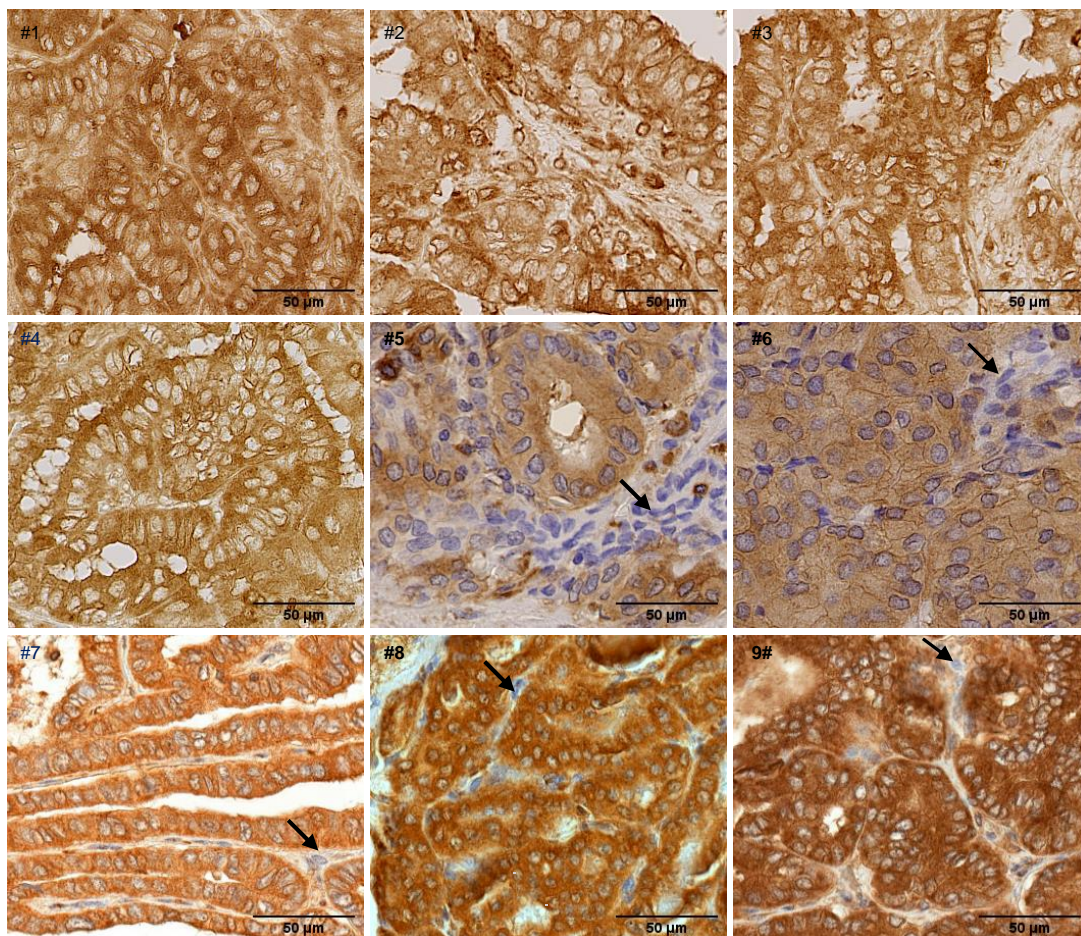

**Fig. S5. Representative images showing cytoplasmic and nuclear localization of RelA in PTC samples.** Paraffin-embedded sections of 9 PTC samples were immunostained using anti-RelA antibody (samples #1, #2, #3 and #4) or immunostained using anti-RelA antibody and counterstained with hematoxylin (samples #5, #6, #7, #8 and #9). Nuclear immunoreactivity is indicated by a slight mauve staining of nuclei in samples #5, #6, #7, #8 and #9, compared to nuclei of stromal cells (indicated by arrows) which displayed blue staining. No hematoxylin staining in samples #1, #2, #3 and #4 allowed to detected RelA immunopositivity in nuclei of tumoral cells with a slight peroxydase-positive staining.

**Supplemental table 4: Clinical characteristics of patients with PTC**

| Patient N° | Type                      | Sex | Age | Tumor size (cm) | TNM *    | Invasion | Extension | Lymph nodes | Risk <sup>\$</sup> |
|------------|---------------------------|-----|-----|-----------------|----------|----------|-----------|-------------|--------------------|
| 1          | classical                 | F   | 51  | 1.3             | pT1b N0  | +        | -         | 0/6         | low                |
| 2          | encapsulated <sup>§</sup> | M   | 24  | 1.8             | pT1b N1a | +        | -         | 8/14        | int                |
| 3          | encapsulated <sup>§</sup> | F   | 36  | 1.2             | pT1b Nx  | minimal  | -         | NA          | int                |
| 4          | classical                 | F   | 23  | 1.5             | pT2 N1a  | +        | -         | 2/9         | int                |
| 5          | classical                 | F   | 45  | 2.5             | pT3b N1a | +        | +         | 3/17        | high               |
| 6          | solid/trabecular          | M   | 59  | 6.7             | pT3b Nx  | +        | +         | NA          | high               |
| 7          | classical                 | F   | 40  | 2               | pT2 N0   | +        | -         | 0/5         | int                |
| 8          | oncocytic                 | M   | 69  | 1.4             | pT3 Nx   | -        | +         | NA          | high               |
| 9          | classical                 | F   | 55  | 0.9             | pT1 N0   | -        | -         | 0/0         | low                |

\*: pathological TNM staging

\$: ATA (American Thyroid Association) risk stratification

§: invasive encapsulated follicular variant

int: intermediate

**Supplemental table 5 : Primary antibodies used for immunoblotting and supershift experiments**

| Antibody target             | Phosphorylation site, if applicable | Host   | Supplier / Catalog#           |
|-----------------------------|-------------------------------------|--------|-------------------------------|
| I $\kappa$ B, alpha         |                                     | rabbit | Santa Cruz / sc-847           |
| phospho-I $\kappa$ B, alpha | Ser32/36                            | mouse  | Cell Signaling / 9246         |
| IKK, alpha                  |                                     | rabbit | Santa Cruz / sc-7182          |
| IKK, beta                   |                                     | rabbit | Cell Signaling / 2678         |
| phospho-IKK                 | Ser176/180                          | rabbit | Cell Signaling / 2697         |
| NF- $\kappa$ B1/p105        |                                     | rabbit | Cell Signaling / 3586         |
| phospho-NF- $\kappa$ B1     | Ser933                              | rabbit | Cell Signaling / 4806         |
| NF- $\kappa$ B2/p100        |                                     | rabbit | Cell Signaling / 4882         |
| NF- $\kappa$ B2/p100        |                                     | rabbit | Santa Cruz / sc-114X          |
| phospho-NF- $\kappa$ B2     | Ser866/870                          | rabbit | Cell Signaling / 4810         |
| NIK                         |                                     | rabbit | Cell Signaling / 4994         |
| NIK                         |                                     | mouse  | Santa Cruz / sc-8417          |
| RelA / p65                  |                                     | rabbit | Santa Cruz / sc-372 / sc-372X |
| RelB                        |                                     | rabbit | Santa Cruz / sc-226 / sc-226X |
| c-Rel                       |                                     | rabbit | Santa Cruz / sc-70X           |
| HDAC                        |                                     | mouse  | Cell Signaling / 5356         |
| GAPDH                       |                                     | rabbit | Santa Cruz / sc-25778         |

**Supplemental table 6 : List of siRNA used for RNA-targeting.**

| <b>Gene target</b> | <b>Sequence 5' to 3'</b>        |
|--------------------|---------------------------------|
| Ctl 1              | 5'-AAAUGGGUGGAGCUCUUGA-3'       |
| Ctl 2              | 5'-CAGUCGCGUUUGCGACUGG-3'       |
| Ctl 3              | 5'-GCGAGCAACCGAACCUAAA-3'       |
| RelA               | 5'-GGAUUGAGGAGAAACGUAA-3'       |
| RelB               | 5'-GACTGCACCGACGGCATCT-3'       |
| NIK 1              | 5'-UACCUCCACUCACGAAGGA-3'       |
| NIK 2              | 5'-GCCAGTCCGAGAGTCTTGATCAGAT-3' |

**Supplemental table 7 : Primers sequences used for qRT-PCR.**

| Target gene | Forward primer (5'>3')    | Reverse primer (5'>3') | Prod. size (bp) |
|-------------|---------------------------|------------------------|-----------------|
| CCL20       | CTGGCTGCTTTGATGTCAGT      | CGTGTGAAGCCCACAATAAA   | 128             |
| LGALS3      | CTTATAACCTGCCTTTGCCTGG    | GCAACATCATTCCCTCTTTGGA | 118             |
| LCN2        | GAAGACAAAGACCCGCAAAAG     | CTGGCAACCTGGAACAAAAG   | 135             |
| MMP1        | CAGATTCTACATGCGCACAAAT    | CTTTGAAAAACCGGACTTCATC | 137             |
| NIK         | CCAGCTGCCATCTCTATCATC     | AAAGGTGGGGCTGAACTCTT   | 66              |
| PPIA        | ATGGCACTGGTGGCAAGTCC      | TTGCCATTCCCTGGACCCAAA  | 241             |
| PLAU        | CCAAAGGCAGCAATGAACT       | CCCCTCATAGCAGGTTTTTG   | 167             |
| RelA        | TTGAGCCCACAAAGCCTTATCAAGT | GGACAATGCCAGTGCCATACAG | 104             |
| RelB        | CTCACTCTCGCTCGCCGTTTC     | CACAGGGCCCAGGGTGACCGT  | 172             |
